# Supplementary material for: Adaptive individual variation in phenological responses to perceived predation levels
Source: PubMed Central journal article supplement (PMC6453887; doi:10.1038/s41467-019-09138-5), 2019-04-08
Supplement: 41467_2019_9138_MOESM1_ESM.pdf [file 41467_2019_9138_MOESM1_ESM.pdf]

# Supplementary Information

**Adaptive individual variation in phenological responses to perceived predation levels**

Abbey-Lee & Dingemanse

**This PDF file includes:**

Supplementary Tables 1 to 4

Supplementary Figure 1

**Supplementary Table 1.** Within-trait among-individual cross-context correlations. We used LRTs to test whether each correlation differed from zero and from one (the latter representing statistical evidence for individual variation in phenotypic plasticity).

|                           | Low-PPL – High-PPL<br>$r_{L,H}$ (SE) | Test of $r = 0$ |    |        | Test of $r = 1$ |     |       |
|---------------------------|--------------------------------------|-----------------|----|--------|-----------------|-----|-------|
|                           |                                      | $\chi^2$        | df | $P$    | $\chi^2$        | df  | $P$   |
| Exploration -Exploration  | 0.93 (0.22)                          | 14.62           | 1  | <0.001 | 0.1             | 0/1 | 0.48  |
| Lay Date - Lay Date       | 0.42 (0.24)                          | 1.87            | 1  | 0.17   | 5.53            | 0/1 | 0.007 |
| Clutch Size - Clutch Size | 0.84 (0.12)                          | 14.74           | 1  | <0.001 | 1.97            | 0/1 | 0.07  |

**Supplementary Table 2.** Variance and repeatability. Summary of models testing treatment effects (Low- versus High Perceived Predation Levels, PPL) on variance components and repeatability, for three levels of variation (PlotYear, Individual, within-individual Residual)

|                    | Variance        |                 |            |          | Repeatability |             |            |          |
|--------------------|-----------------|-----------------|------------|----------|---------------|-------------|------------|----------|
|                    | Low-PPL         | High-PPL        |            |          | Low-PPL       | High-PPL    |            |          |
| <b>Exploration</b> | $\sigma^2$ (SE) | $\sigma^2$ (SE) | $\chi^2_1$ | <i>P</i> | R (SE)        | R (SE)      | $\chi^2_1$ | <i>P</i> |
| PlotYear           | 10.83 (13.22)   | 13.81 (14.44)   | 0.02       | 0.89     | 0.02 (0.02)   | 0.03 (0.03) | 0.02       | 0.89     |
| Individual         | 285.51 (70.43)  | 257.02 (65.59)  | 0.08       | 0.78     | 0.55 (0.12)   | 0.52 (0.12) | 0.03       | 0.86     |
| Residual           | 226.71 (59.71)  | 227.29 (56.44)  | 0          | 1.00     | 0.43 (0.12)   | 0.46 (0.11) | 0.02       | 0.89     |
| <b>Lay Date</b>    | $\sigma^2$ (SE) | $\sigma^2$ (SE) | $\chi^2_1$ | <i>P</i> | R (SE)        | R (SE)      | $\chi^2_1$ | <i>P</i> |
| PlotYear           | 91.40 (39.44)   | 87.19 (37.78)   | 0.002      | 0.96     | 0.83 (0.06)   | 0.80 (0.07) | 0          | 1.00     |
| Individual         | 11.73 (2.84)    | 19.45 (2.96)    | 3.86       | 0.05     | 0.11 (0.05)   | 0.18 (0.07) | 4.03       | 0.04     |
| Residual           | 6.38 (2.13)     | 2.80 (1.01)     | 2.68       | 0.10     | 0.06 (0.03)   | 0.03 (0.01) | 2.62       | 0.11     |
| <b>Clutch Size</b> | $\sigma^2$ (SE) | $\sigma^2$ (SE) | $\chi^2_1$ | <i>P</i> | R (SE)        | R (SE)      | $\chi^2_1$ | <i>P</i> |
| PlotYear           | 0.29 (0.18)     | 0.42 (0.25)     | 0.04       | 0.84     | 0.10 (0.06)   | 0.14 (0.07) | 0          | 1.00     |
| Individual         | 2.04 (0.31)     | 2.07 (0.36)     | 0.05       | 0.82     | 0.74 (0.08)   | 0.69 (0.09) | 0          | 1.00     |
| Residual           | 0.42 (0.14)     | 0.52 (0.18)     | 0.2        | 0.65     | 0.15 (0.05)   | 0.17 (0.06) | 0.14       | 0.71     |

**Supplementary Table 3.** Population average responses. Sources of variation in exploratory behavior, lay date, and clutch size, derived from trait-specific univariate linear mixed-effects models.

|                          | Exploration     |                 |                |          | Lay Date        |                 |                |          | Clutch Size     |                 |                |          |
|--------------------------|-----------------|-----------------|----------------|----------|-----------------|-----------------|----------------|----------|-----------------|-----------------|----------------|----------|
| Fixed effects            | $\beta$ (SE)    | F(NUMdf, DENdf) | <i>P</i>       |          | $\beta$ (SE)    | F(NUMdf, DENdf) | <i>P</i>       |          | $\beta$ (SE)    | F(NUMdf, DENdf) | <i>P</i>       |          |
| Intercept <sup>a</sup>   | 60.5 (1.80)     | 3320 (1, 30.2)  | <0.001         |          | 20.6 (2.75)     | 110 (1, 22.3)   | <0.001         |          | 8.60 (0.22)     | 2840 (1, 29.8)  | <0.001         |          |
| Treatment <sup>b</sup>   | 1.27 (2.06)     | 0.38 (1, 19.8)  | 0.54           |          | -0.20 (3.89)    | 0.00 (1, 22.1)  | 0.96           |          | 0.03 (0.30)     | 0.01 (1, 22.4)  | 0.92           |          |
| Time of day <sup>c</sup> | 0.77 (0.49)     | 2.44 (1, 213)   | 0.12           |          |                 |                 |                |          |                 |                 |                |          |
| Sex <sup>d</sup>         | 6.80 (1.97)     | 11.94 (1, 460)  | <0.001         |          |                 |                 |                |          |                 |                 |                |          |
| Random effects           | $\sigma^2$ (SE) | R (SE)          | $\chi^2_{0/1}$ | <i>P</i> | $\sigma^2$ (SE) | R (SE)          | $\chi^2_{0/1}$ | <i>P</i> | $\sigma^2$ (SE) | R (SE)          | $\chi^2_{0/1}$ | <i>P</i> |
| PlotYear identity        | 6.37 (7.57)     | 0.01 (0.01)     | 0.98           | 0.16     | 89.4 (27.3)     | 0.82 (0.05)     | 463            | <0.001   | 0.39 (0.16)     | 0.13 (0.05)     | 31.8           | <0.001   |
| Individual identity      | 265 (40.7)      | 0.52 (0.07)     | 33.8           | <0.001   | 11.0 (2.22)     | 0.10 (0.03)     | 15.9           | <0.001   | 1.90 (0.24)     | 0.65 (0.06)     | 50.1           | <0.001   |
| Residual                 | 238 (32.0)      | 0.47 (0.06)     |                |          | 8.87 (1.65)     | 0.08 (0.02)     |                |          | 0.62 (0.12)     | 0.21 (0.04)     |                |          |

<sup>a</sup> reference category; estimate is for low-PPL (perceived predation level) plots

<sup>b</sup> difference between the treatments (high – low PPL)

<sup>c</sup> in hours since sunrise, mean centered

<sup>d</sup> difference between the sexes (females – males)

**Supplementary Table 4.** Among-individual within-context correlations for the (A) low-PPL and (B) high-PPL treatment group derived from treatment-specific tri-variate mixed-effects models (used as input for our structural equation models).

| (A)                       | Low-PPL<br>$r_{I_{L,L}}$ (SE)  |
|---------------------------|--------------------------------|
| Exploration – Lay Date    | 0.32 (0.20)                    |
| Lay Date – Clutch Size    | -0.40 (0.14)                   |
| Exploration - Clutch Size | 0.22 (0.14)                    |
| (B)                       | High-PPL<br>$r_{I_{H,H}}$ (SE) |
| Exploration – Lay Date    | -0.21 (0.18)                   |
| Lay Date – Clutch Size    | -0.36 (0.11)                   |
| Exploration - Clutch Size | 0.26 (0.19)                    |

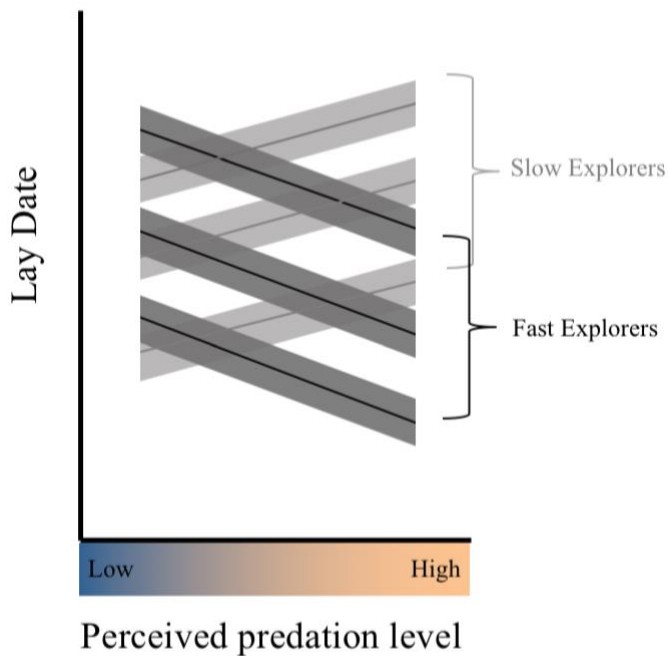

**Supplementary Figure 1.** Conceptual illustration (reaction norm plot) of the alternative reproductive strategies revealed by our experimental manipulations of PPL in a wild passerine bird population. Fast (dark grey) versus slow (light grey) explorers breed relatively late versus early under low-PPL but relatively early versus late under high-PPL. Personality-related individual differences in plasticity cause decreased breeding synchrony in the high- compared to low-PPL treatment group. Both strategies have equal reproductive success in both treatment groups.
