# Supplementary material for: Adaptive individual variation in phenological responses to perceived predation levels
Source: PubMed Central journal article supplement (PMC6453887; doi:10.1038/s41467-019-09138-5), 2019-04-08
Supplement: 41467_2019_9138_MOESM3_ESM.pdf [file 41467_2019_9138_MOESM3_ESM.pdf]

## **Description of Additional Supplementary Files**

File Name: Supplementary Data 1

Description: Statistical Code. Code for statistical analyses in ASReml and R used to generate the results in this manuscript.
